# Supplementary material
Source: Springer Nature journal article supplement (https://www.springermedizin.de/resource/supplementary/13049_2011_305_MOESM2_ESM.pdf/9666308)

## Instructions needed for successful insertion

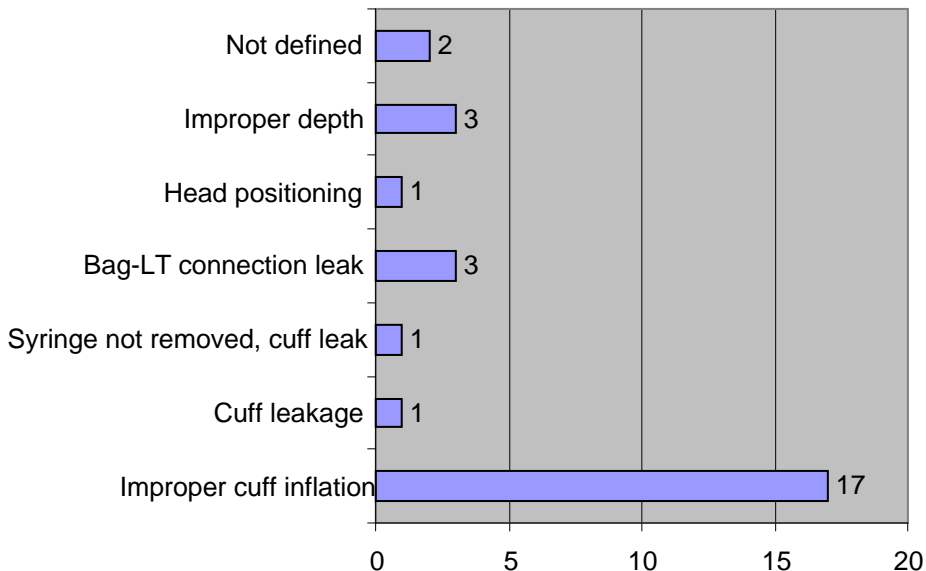

Supplement: MOESM2 [file 9666308]
